# Supplementary material for: Construction of a practice model of evidence-based health service development for public health nursing in Japan: a Delphi survey
Source: Research Square preprint supplement (doi:10.21203/rs.3.rs-6291261/v1), 2025-04-25
Supplement: Supplementary file 1 [file 5179526cd69211942da96d2c.pdf]

Delphi survey: Round 3 Questionnaire

Q1.

■For each item, please choose the level of agreement you feel from the five choices in the answer box.

●Please check the distribution of the first and second responses in the column on the left.

●The underlined parts indicate the parts that have been revised since the previous round.

Results of the first round  
N=99

Results of the second round  
N=90

4 "Agree"

5 "Completely agree"

the qualities are shown.

25th/ 50th/ 75th percentile

Practice model of evidence-based health service development

Stages  
Aim, (PDCA)

Items

1

4/5/5

5/5/5

Preparation stage:  
Leading to the best decision or plan  
(A→P)

Clarify the issues requiring the development/improvement of the project/program

5

4

3

2

1

2

4/5/5

4/5/5

Identify issues and set targets among the stakeholders

5

4

3

2

1

3

4/5/5

4/4/5

Explore best practices to achieve the target

5

4

3

2

1

4

4/4/5

4/4/5

Examine evidence of the best practice/existing project and select possible options

5

4

3

2

1

5

4/4/5

4/4/5

Validate the applicability of possible options for the project/program

5

4

3

2

1

6

4/5/5

4/5/5

Clarify the incentives and disincentives for planning, execution and evaluation

5

4

3

2

1

7

4/5/5

4/5/5

Implementation stage:  
Leading from planning and execution to outcome  
(PD→C)

Make decisions on the start/continuation of the project/program

5

4

3

2

1

8

4/5/5

4/5/5

Prepare execution and evaluation plans for the project/action

5

4

3

2

1

9

4/4/5

4/4/5

Include in the execution plan measures to leverage incentives and address disincentives

5

4

3

2

1

10

4/4/5

4/4/5

Include in the evaluation plan how to evaluate the result of addressing incentives and disincentives

5

4

3

2

1

11

4/5/5

4/5/5

Execute/replicate the project/action

5

4

3

2

1

12

4/5/5

4/5/5

Monitor the execution/replication of the project/program

5

4

3

2

1

13

4/5/5

4/5/5

Dissemination stage:  
Leading from evaluation and improvement to use of outcomes  
(CA→P')

Evaluate the outcome of the project/program

5

4

3

2

1

14

4/5/5

4/5/5

Clarify required improvements based on the evaluation of the project/program

5

4

3

2

1

15

4/4/5

4/5/5

Consider improvement measures for, or upscaling and downscaling of the project/program

5

4

3

2

1

16

4/4/5

4/4/5

Make public the outcomes/evidence of the project/program and promote measures for dissemination

5

4

3

2

1

Foundation of practice

continuing professional development:  
Leading to society's trust in PHNs

Continue competency development as professionals (outcome-producing behavioral trait and capacity)

5

4

3

2

1

Q2. For the three-stage structure of the Practice Model, please choose the level of agreement you feel from the five choices in the answer box.

4/4/4

4/4/5

5. Completely agree

4. Agree

3. Do not know

2. Do not agree

1. Do not agree at all

...

Answer

Q3. For designating “continuing professional development” as the foundation of practice, please choose the level of agreement you feel from the five choices in the answer box.

4/5/5

4/5/5

5. Completely agree

4. Agree

3. Do not know

2. Do not agree

1. Do not agree at all

...

Answer

Q4. Please write any comments or points you notice regarding the revised version of the practical model shown above.
