# Supplementary material for: Construction of a practice model of evidence-based health service development for public health nursing in Japan: a Delphi survey
Source: Research Square preprint supplement (doi:10.21203/rs.3.rs-6291261/v1), 2025-04-25
Supplement: Supplementary file 1 [file c29d53e71d2371f63ed51318.xlsx]

## Sheet: Table 1
	Table 1 Demographics of the expert panel						（Round 1：N=99）
	Attributes and Selection Criteria					ｎ	％
	Attributes	Experience as PHN		Less than 10 years		19	19.1919
				10-19 years		9	9.09091
		Mean 25.5 ±SD 12.8		20-29 years		16	16.1616
				30 years or more		55	55.5556
		Academic qualification		Postgraduate degree (Master・Doctorate）		53	53.5354
				Others		46	46.4646
		Geographical area		Hokkaido/Tohoku		12	12.1212
				Kanto/Koshinetsu		17	17.1717
				Tokai/Hokuriku		16	16.1616
				Kinki		26	26.2626
				Chugoku/Shikoku		13	13.1313
				Kyushu/Okinawa		15	15.1515
	Selection Criteria	Affiliation		Local governments (prefectures)		24	24.2424
				Local governments (Government-designated cities with health centers)		28	28.2828
	Criterion A: Expertise			Faculty institutions		47	47.4747
		Position	Practitioner	Section chief or above		52	100
		教育研究機関の118人中、保健師経験あり（不明1）	n=52	None		0	0
			Faculty	Professor		33	70.2128
				Associate Professor/Lecturer		14	29.7872
		教育研究機関の118人中、保健師経験あり（不明1）	n=47	Assistant professor or below		0	0
	Criterion B: Heterogeneity	Job category		Practitioner		52	52.5253
				Faculty (Educator/Researcher)		47	47.4747
		Details	Practitioner	Supervising PHN		31	59.6154
			n=52	None		21	40.3846
	Criterion C Interest	Willingness to cooperate	Number of people who responded to the request for cooperation in writing: 608
			→ Of these, the number of people who responded to the request for cooperation by email: 118 (19.4%)
			→ Of these, the number of people who actually cooperated in the survey: 99 (16.4%)
		Training history related to health service development		Yes (multiple times or several-day course training)		32	32.3232
				Yes (one-off, one time)		20	20.202
				No		47	47.4747
	Selection criteria concerned (Those who fulfill any three of the following requirements: ①② in A, ①② in B, and ①② in C) :
	A Expertise: ① Different Professional Affiliations; Whether the affiliation is a local government (prefecture), local government (Government-designated cities with health centers), or faculty institution. ② Position requiring specialization; Whether or not the practitioner is a section chief or above, whether or not the faculty is a lecturer or above.
	B Heterogeneity: ① Whether or not the practitioner or faculty is in a different occupation, ② Whether or not the practitioner has a supervisory role (supervising public health nurse)
	C Interest: ① Whether or not the panel expressed a willingness to cooperate with the survey and cooperated with it, ② Whether or not the panel has attended related training courses.

## Sheet: Table 2
	Table 2. Consensus formation in the Delphi survey
					Frequency distribution ％																		Agreement % (4+5)				Degree of consensus									Comments
				Items	Round 1 N=99						Round 2 N=91						Round 3 N=81						Round 1	Round 2	Round 3		Round 1			Round 2			Round 3			Round 1		Round 2		Round 3
			No.		1	2	3	4	5		1	2	3	4	5		1	2	3	4	5		4＋5	4＋5	4＋5		Med.	IQR		Med.	IQR		Med.	IQR		num.		num.		num.
	Practice model of evidence-based health service development	Preparation stage: Leading to the best decision or plan (A→P)	1	Clarify the issues requiring the development/improvement of the project/program	1.0101	0	1.0101	27.2727	70.7071		1.0989	0	0	23.0769	75.8242		0	0	1.23457	2.46914	96.2963		97.9798	98.9011	98.7654		5	1		5	0		5	0		5		2		1
			2	Identify issues and set targets among the stakeholders	1.0101	0	5.05051	29.2929	64.6465		1.0989	0	2.1978	27.4725	69.2308		0	0	1.23457	9.87654	88.8889		93.9394	96.7033	98.7654		5	1		5	1		5	0		3		0		1
			3	Explore best practices to achieve the target	1.0101	0	7.07071	41.4141	50.5051		1.0989	1.0989	8.79121	50.5495	38.4615		0	0	2.46914	35.8025	61.7284		91.9192	89.011	97.5309		5	1		4	1		5	1		8		6		3
			4	Examine evidence of the best practice/existing project and select possible options	0	1.0101	11.1111	44.4444	43.4343		1.0989	1.0989	6.59341	51.6484	39.5604		0	0	2.46914	35.8025	61.7284		87.8788	91.2088	97.5309		4	1		4	1		5	1		7		3		0
			5	Validate the applicability of possible options for the project/program	1.0101	0	7.07071	48.4848	43.4343		1.0989	0	5.49451	48.3516	45.0549		0	0	1.23457	33.3333	65.4321		91.9192	93.4066	98.7654		4	1		4	1		5	1		1		1		0
			6	Clarify the incentives and disincentives for planning, execution and evaluation	1.0101	1.0101	7.07071	38.3838	52.5253		1.0989	0	6.59341	30.7692	61.5385		0	0	2.46914	19.7531	77.7778		90.9091	92.3077	97.5309		5	1		5	1		5	0		1		2		0
		Implementation stage: Leading from planning and execution to outcome (PD→C)	7	Make decisions on the start/continuation of the project/program	1.0101	0	6.06061	38.3838	54.5455		1.0989	0	5.49451	26.3736	67.033		0	0	1.23457	7.40741	91.358		92.9293	93.4066	98.7654		5	1		5	1		5	0		1		0		1
			8	Prepare execution and evaluation plans for the project/action	1.0101	0	6.06061	25.2525	67.6768		1.0989	0	4.3956	21.978	72.5275		0	0	1.23457	9.87654	88.8889		92.9293	94.5055	98.7654		5	1		5	1		5	0		4		0		0
			9	Include in the execution plan measures to leverage incentives and address disincentives	1.0101	1.0101	10.101	43.4343	44.4444		0	2.1978	5.49451	43.956	48.3516		0	0	4.93827	33.3333	61.7284		87.8788	92.3077	95.0617		4	1		4	1		5	1		2		4		3
			10	Include in the evaluation plan how to evaluate the result of addressing incentives and disincentives	1.0101	2.0202	12.1212	46.4646	38.3838		0	2.1978	10.989	41.7582	45.0549		0	0	3.7037	32.0988	64.1975		84.8485	86.8132	96.2963		4	1		4	1		5	1		3		4		0
			11	Execute/replicate the project/action	1.0101	0	3.0303	29.2929	66.6667		0	1.0989	4.3956	20.8791	73.6264		0	0	2.46914	9.87654	87.6543		95.9596	94.5055	97.5309		5	1		5	1		5	0		1		1		0
			12	Monitor the execution/replication of the project/program	1.0101	0	5.05051	38.3838	55.5556		0	1.0989	4.3956	23.0769	71.4286		0	0	1.23457	16.0494	82.716		93.9394	94.5055	98.7654		5	1		5	1		5	0		2		2		0
		Dissemination stage: Leading from evaluation and improvement to use of outcomes (CA→P’)	13	Evaluate the outcome of the project/program	1.0101	0	1.0101	32.3232	65.6566		1.0989	0	4.3956	19.7802	74.7253		0	0	2.46914	7.40741	90.1235		97.9798	94.5055	97.5309		5	1		5	1		5	0		1		3		1
			14	Clarify required improvements based on the evaluation of the project/program	1.0101	0	2.0202	29.2929	67.6768		0	1.0989	3.2967	25.2747	70.3297		0	0	1.23457	12.3457	86.4198		96.9697	95.6044	98.7654		5	1		5	1		5	0		1		1		0
			15	Consider improvement measures for, or upscaling and downscaling of the project/program	0	0	10.101	45.4545	44.4444		0	1.0989	5.49451	40.6593	52.7473		0	0	3.7037	19.7531	76.5432		89.899	93.4066	96.2963		4	1		5	1		5	0		3		2		1
			16	Make public the outcomes/evidence of the project/program and promote measures for dissemination	0	2.0202	15.1515	44.4444	38.3838		0	1.0989	6.59341	46.1538	46.1538		0	0	2.46914	33.3333	64.1975		82.8283	92.3077	97.5309		4	1		4	1		5	1		3		1		0
	Foundation of practice	continuing professional development: Leading to society’s trust in PHNs	17	Continue competency development as professionals (outcome-producing behavioral trait and capacity)	3.0303	1.0101	14.1414	31.3131	50.5051		0	1.0989	7.69231	35.1648	56.044		0	0	2.46914	24.6914	72.8395		81.8182	91.2088	97.5309		5	1		5	1		5	1		9		9		2
	The three-stage structure of the Practice Model				0	2.0202	14.1414	59.596	24.2424		0	0	8.79121	54.9451	36.2637		0	0	3.7037	28.3951	67.9012		83.8384	91.2088	96.2963		4	0		4	1		5	1		11		9		0
	Designating “continuing professional development” as the foundation of practice				0	2.0202	17.1717	51.5152	29.2929		0	3.2967	14.2857	34.0659	48.3516		0	0	1.23457	24.6914	74.0741		80.8081	82.4176	98.7654		4	1		4	1		5	1		22		17		0
	Rating scale:			1 to 5, with 1 indicating “Do not agree at all,” 2 “Do not agree,” 3 “Do not know,” 4 “Agree” and 5 “Completely agree.”
	Criteria for determination on consensus formation:			The percentage of agreement was judged as high where scores of 4 and 5 on the rating scale combined accounted for 80% or over of the total responses, and medium when the share was 70% or over.
				The degree of consensus was judged from the median value and the interquartile range (IQR), indicating the distance between the first and third quartiles, either as high (median of 5, IQR of 0 or 1) or medium (median of 4, IQR of 1).

## Sheet: Table 3
	Table 3. Practice model of evidence-based health service development, and Foundation of practice
				Modified draft		Draft
	Practice model of evidence-based health service development	Preparation stage: Leading to the best decision or plan (A→P)	1	Clarify the issues requiring the development/improvement of the project/program.		Clarify the issues requiring the development/improvement of the project/program.
			2	Identify issues and set targets among the stakeholders.		Identify issues and set targets to be achieved among the stakeholders.
			3	Explore best practices to achieve the target.		Select possible options for the best practices to achieve the target (or for an existing project, validate continuation through evaluation and improvement).
			4	Examine evidence of the best practice/existing project and select possible options.		Examine evidence of possible options for the best practice/existing project.
			5	Validate the applicability of possible options for the project/program.		Validate the applicability of possible options.
			6	Clarify the incentives and disincentives for planning, execution and evaluation.		Identify the incentives and disincentives for planning, execution and evaluation.
		Implementation stage: Leading from planning and execution to outcome (PD→C)	7	Make decisions on the start/continuation of the project/program.		Make decisions on the start/continuation of the project/program.
			8	Prepare execution and evaluation plans for the project/action.		Prepare execution and evaluation plans for the project/action.
			9	Include in the execution plan measures to leverage incentives and address disincentives.		Include in the execution plan how to leverage incentives and address disincentives.
			10	Include in the evaluation plan how to evaluate the result of addressing incentives and disincentives.		Include in the evaluation plan how to evaluate the outcome of addressing incentives/disincentives.
			11	Execute/replicate the project/action.		Execute/replicate the project/action.
			12	Monitor the execution/replication of the project/program.		Monitor/optimize the replication process of the plan.
		Dissemination stage: Leading from evaluation and improvement to use of outcomes (CA→P’)	13	Evaluate the outcome of the project/program.		Evaluate the outcome of the project/program after execution.
			14	Clarify required improvements based on the evaluation of the project/program.		Clarify required improvements based on the evaluation of the project/program.
			15	Consider improvement measures for, or upscaling and downscaling of the project/program.		Replicate quality improvement/upscaling measures.
			16	Make public the outcomes/evidence of the project/program and promote measures for dissemination.		Make public the outcomes/evidence and promote measures for dissemination.
	Foundation of practice	Continuing professional development: Leading to society’s trust in PHNs	17	Continue competency development as professionals (outcome-producing behavioral trait and capacity).		Continue competency development as professionals.
	In practice, the initial draft was modified after Round 1, the first modified draft was further modified after Round 2, and the second modified draft was turned into the final draft following the validation of consensus after Round 3.
	The underlines in the table indicate modified parts. Forward slash (/) means “and/or.”
	The item numbers are for convenience and do not indicate any order or priority.

## Sheet: Sheet1
				正しい決定を導く準備段階、確実な成果を導く実装段階、活用と改善を導く普及段階、
				保健師の社会的信用を導く展開

## Sheet: 管理者用1
データ転送シート
		問1																	問２						問3																		問4	問5	問6	問7	問8
	ID	1	2	3	4	5	6	7	8	9	10	11	12	13	14	15	16	17	項目番号		項目番号		項目番号
2回目	#REF!	#REF!	#REF!	#REF!	#REF!	#REF!	#REF!	#REF!	#REF!	#REF!	#REF!	#REF!	#REF!	#REF!	#REF!	#REF!	#REF!	#REF!	#REF!	#REF!	#REF!	#REF!	#REF!	#REF!	#REF!	#REF!	#REF!	#REF!	#REF!	#REF!	#REF!	#REF!	#REF!	#REF!	#REF!	#REF!	#REF!	#REF!	#REF!	#REF!	#REF!	#REF!	#REF!	#REF!	#REF!	#REF!	#REF!

## Sheet: 管理者用2
問1	5	4	3	2	1
問2	1	2	3	4	5	6	7	8	9	10	11	12	13	14	15	16	17
問4,6	5．完全に同意する	4．同意する	3．どちらともいえない	2．同意しない	1．全く同意しない
